# Supplementary figures and images for: Ability of postoperative delirium to predict intermediate-term postoperative cognitive function in patients undergoing elective surgery at an academic medical centre: protocol for a prospective cohort study
Source: PubMed Central journal article supplement — BMJ Open. 2018 Mar 17;8(3):e017079. doi: 10.1136/bmjopen-2017-017079 (PMC5875681; doi:10.1136/bmjopen-2017-017079), 2018-03-17

## Patient Recruitment

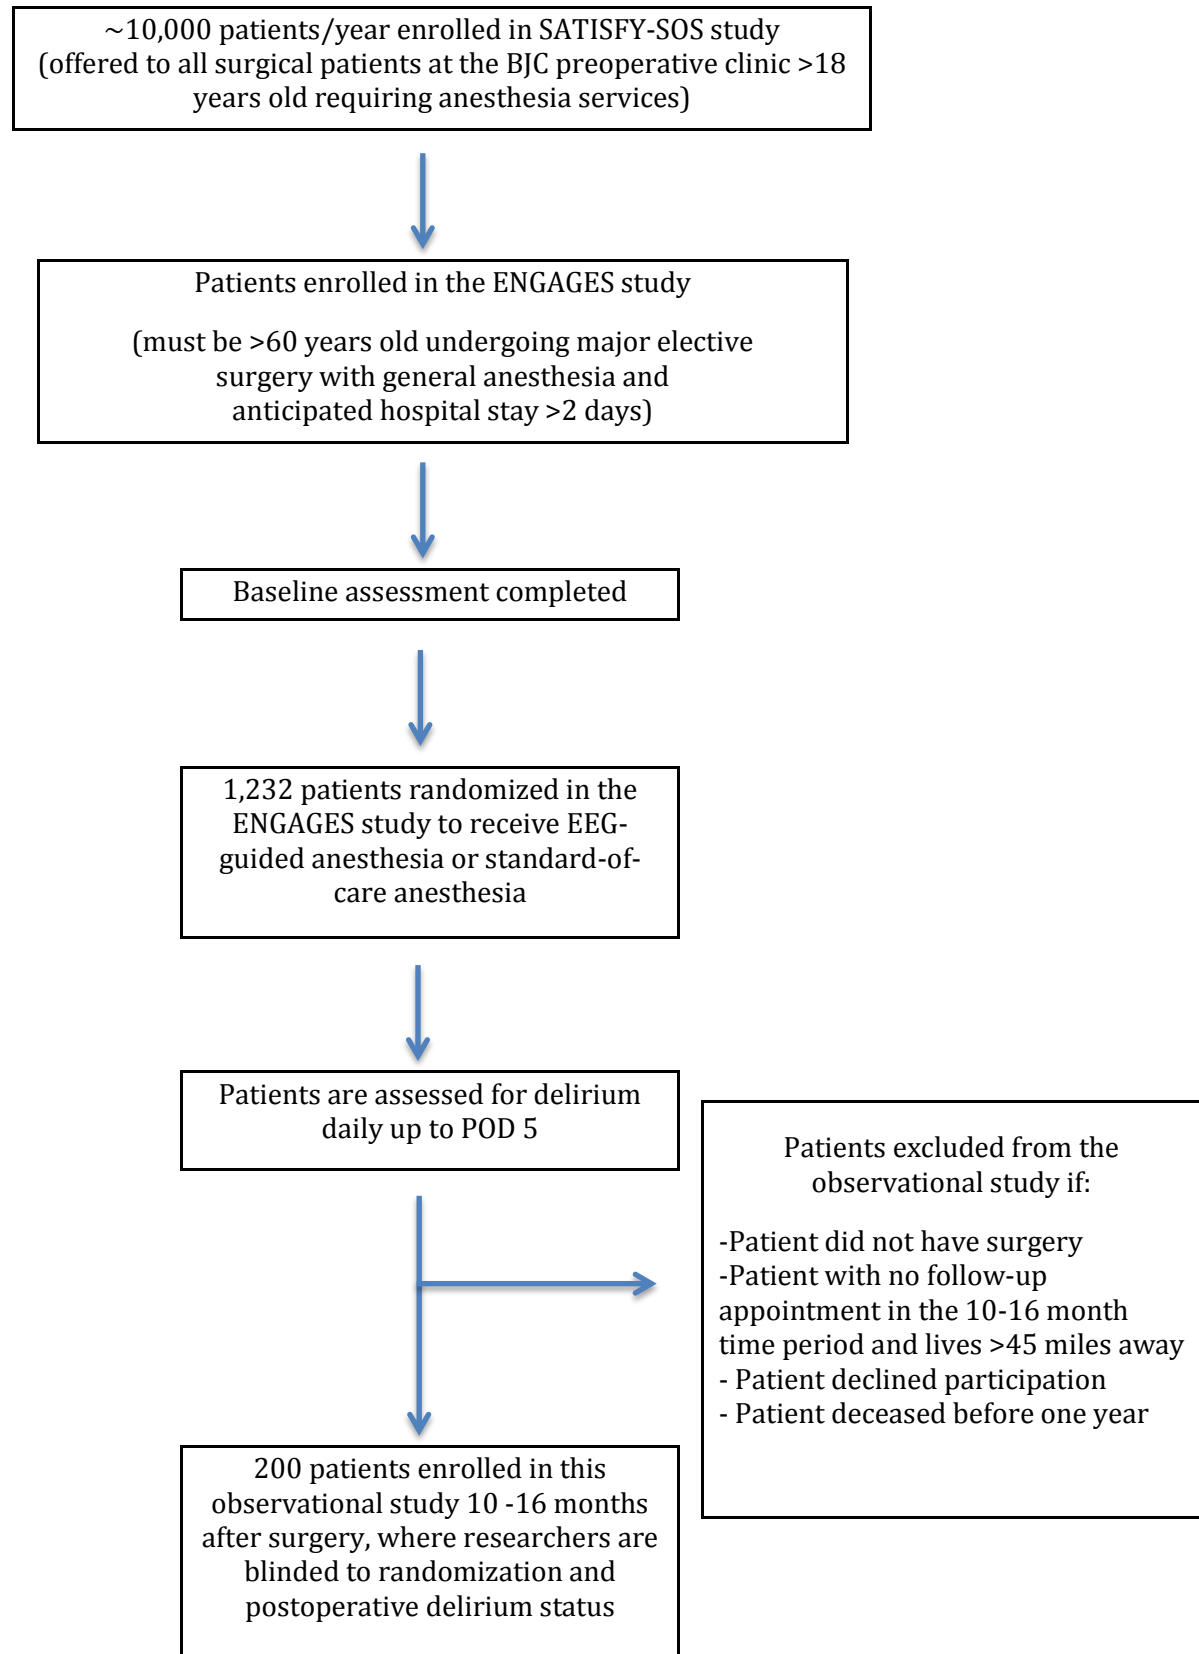

Supplement: bmjopen-2017-017079supp002.pdf [file bmjopen-2017-017079supp002.pdf]
